# Supplementary figures and images for: Tubulogenesis of co-cultured human iPS-derived endothelial cells and human mesenchymal stem cells in fibrin and gelatin methacrylate gels
Source: Royal Society of Chemistry journal article supplement (doi:10.1039/c7bm00223h), 2017-01-01

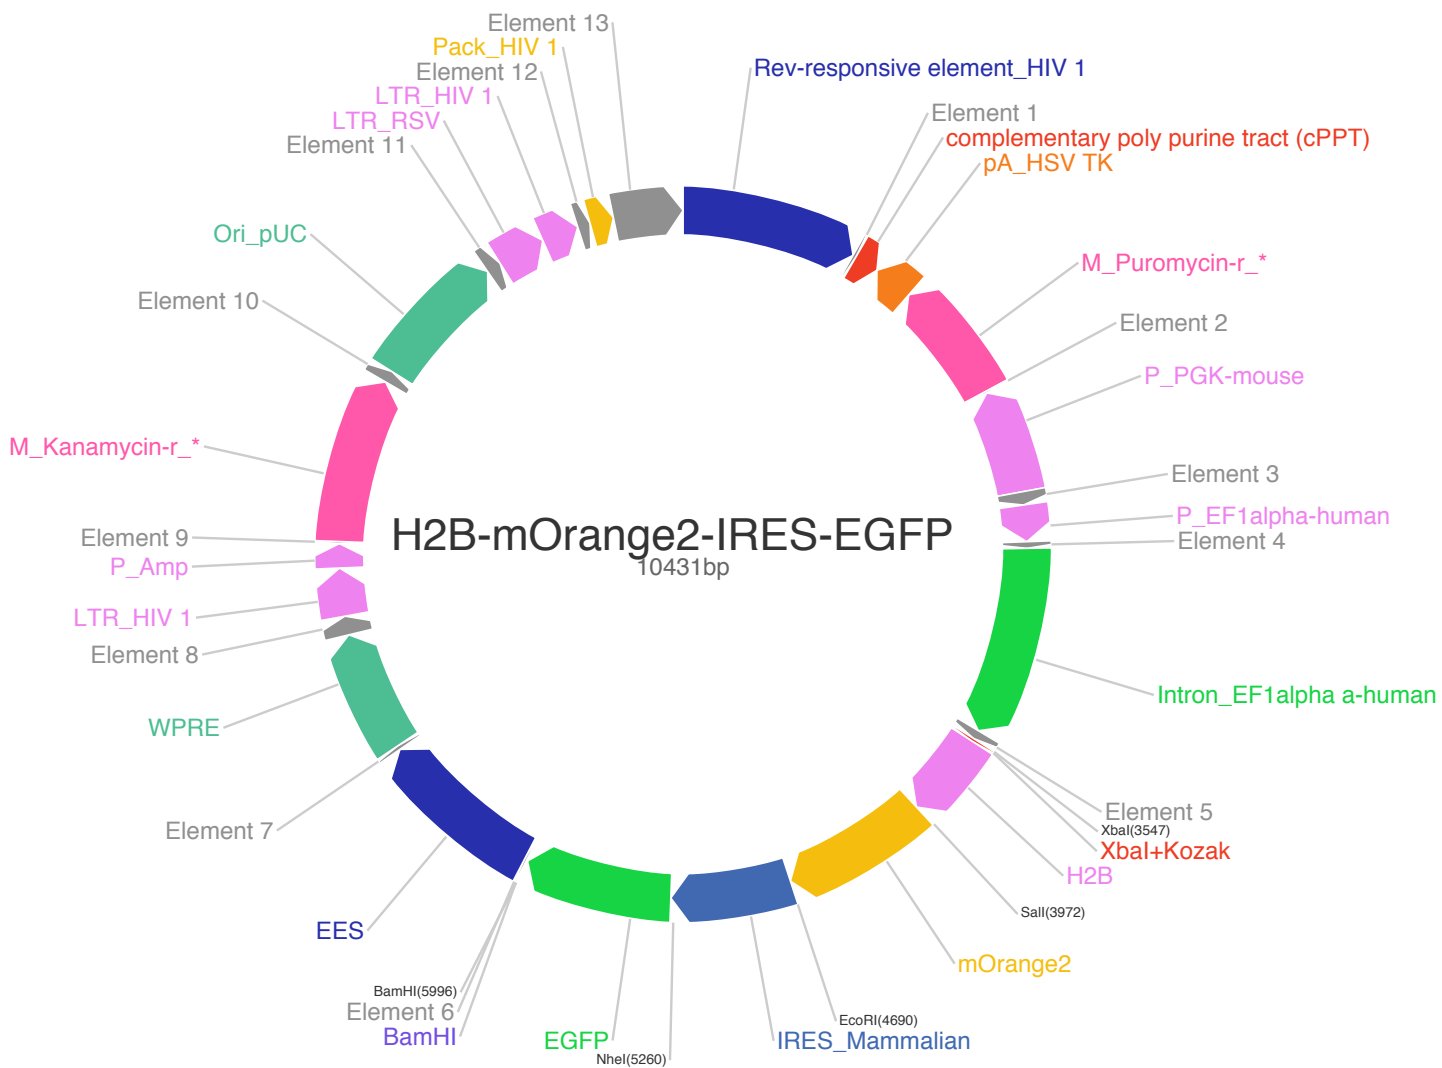

Supplement: c7bm00223h2.zip [file c7bm00223h2.zip]

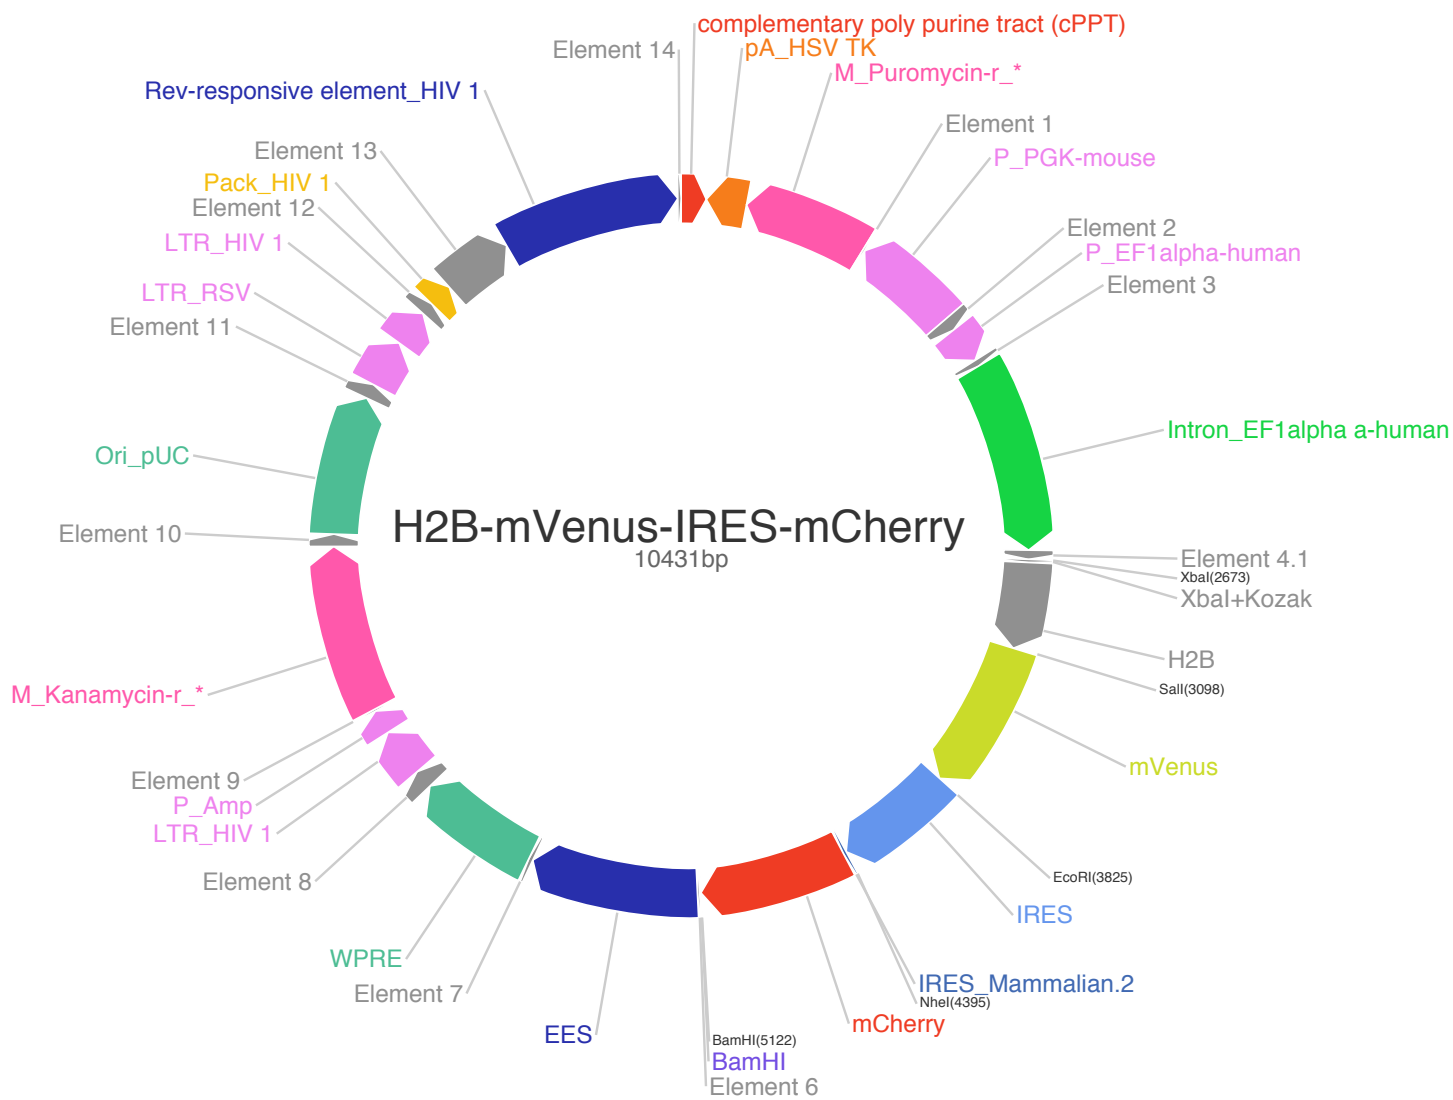

Supplement: c7bm00223h2.zip [file c7bm00223h2.zip]
